# Supplementary material for: Iprodione Removal by UV-Light-, Zero-Valent Iron- and Zero-Valent Aluminium-Activated Persulfate Oxidation Processes in Pure Water and Simulated Tertiary Treated Urban Wastewater
Source: MDPI journal article supplement (doi:10.3390/w13121679), 2021-06-17
Supplement: s1 [file s1]

Archive with 1 entries (1 files):
- water-1156109-supplementary.pdf
