# Supplementary material for: Iprodione Removal by UV-Light-, Zero-Valent Iron- and Zero-Valent Aluminium-Activated Persulfate Oxidation Processes in Pure Water and Simulated Tertiary Treated Urban Wastewater
Source: MDPI journal article supplement (doi:10.3390/w13121679), 2021-06-17
Supplement: s1 [file s1 › water-1156109-supplementary.pdf]

## Supplementary Material

# Iprodione Removal by UV-light-, Zero-Valent Iron- and Zero-Valent Aluminium-Activated Persulfate Oxidation Processes in Pure Water and Simulated Tertiary Treated Urban Wastewater

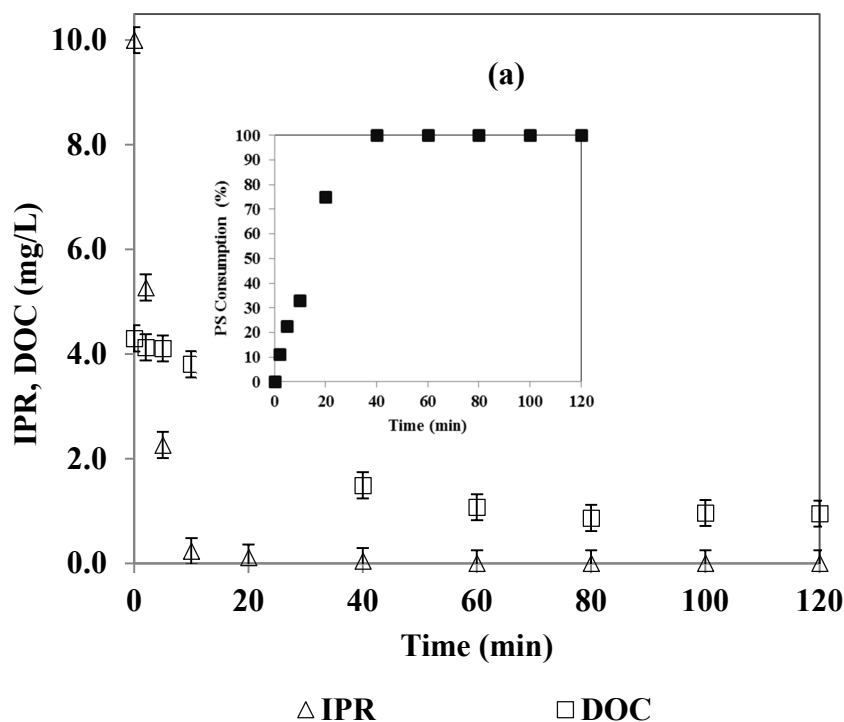

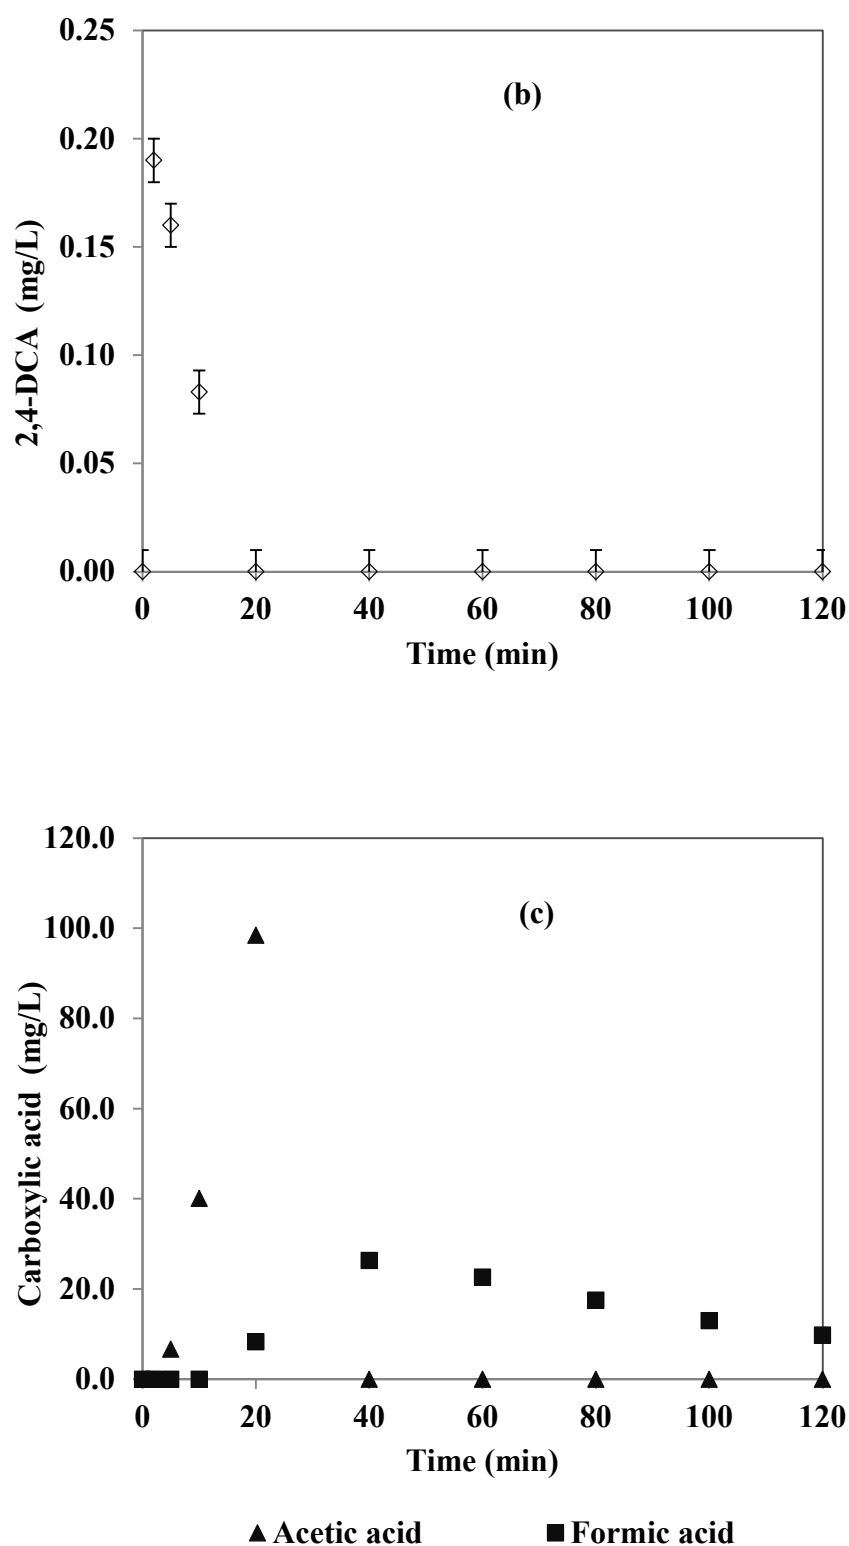

**Figure 1.** Changes in IPR and DOC (a), 2,4-DCA (b) and carboxylic acids (c) concentrations during UV-C/PS treatment of IPR in DW. IPR=10 mg/L; PS=0.30 mM; DOC of 10 mg/L IPR=4.3 mg/L; UV-C intensity=0.5 W/L; pH=6.2. Figure S1 (a) insert shows the calculated PS consumptions (%) during UV-C/PS treatment of 10 mg/L IPR in DW.

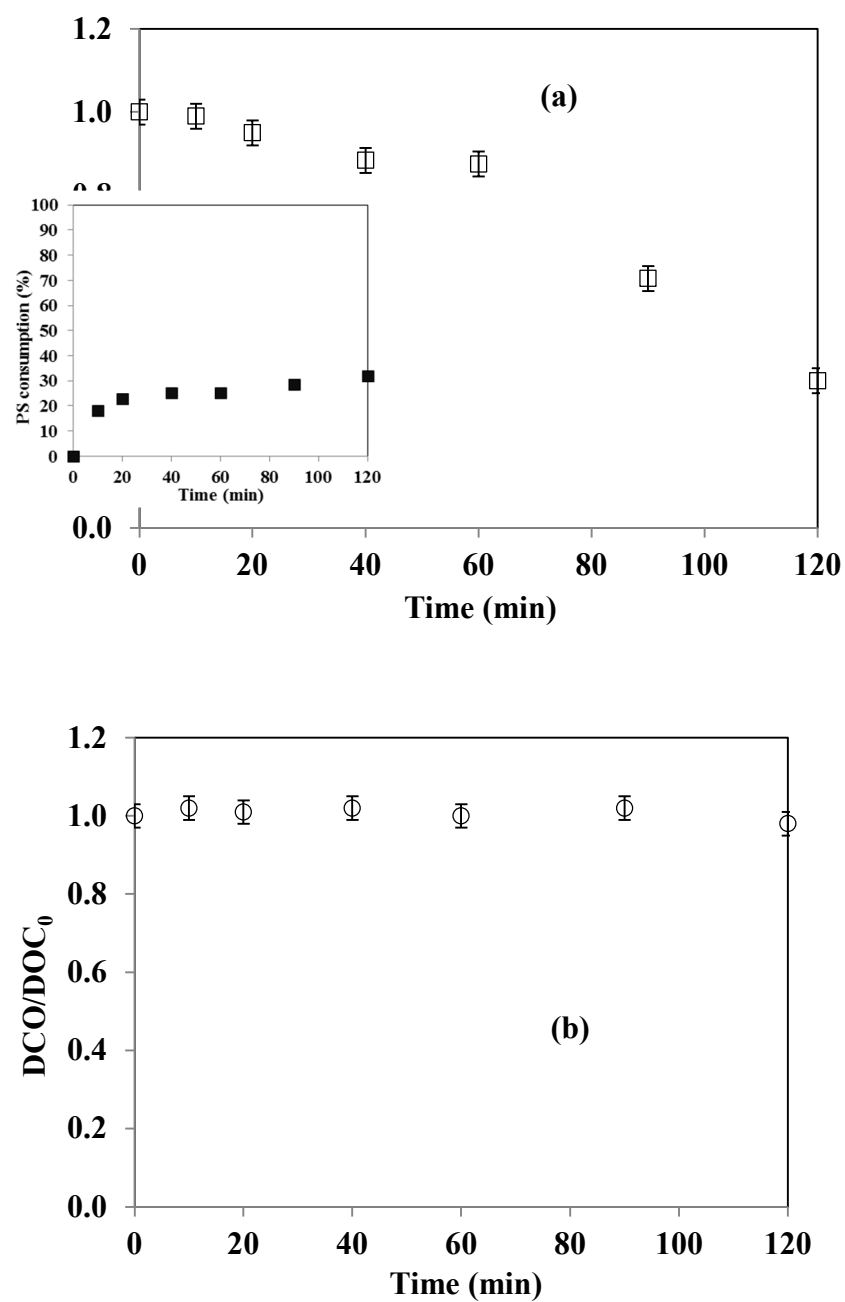

**Figure 2.** Changes in normalized IPR (a) and DOC (b) values during ZVA/PS treatment in DW. IPR=10 mg/L; PS=2.50 mM; DOC for 10 mg/L IPR=4.3 mg/L; ZVA=1 g/L; pH=3.0. Figure S2 (a) insert shows the calculated PS consumptions (%) during ZVA/PS treatment of 10 mg/L IPR in DW.

**Table 1.** IPR removals obtained during mere ZVI treatment at an initial pH of 5.0, mere ZVA treatment at an initial pH of 3.0 as well as mere PS treatment of IPR at pH = 6.2. IPR=2 mg/L; ZVI=1 g/L; ZVA=1 g/L; PS=1.00 mM.

| Time (min) | IPR Removal (%) |          |         |
|------------|-----------------|----------|---------|
|            | Mere ZVI        | Mere ZVA | Mere PS |
| 0          | 0               | 0        | 0       |
| 2          | 0               | 0        | 0       |
| 5          | 0               | 8        | 0       |
| 10         | 0               | 7        | 0       |
| 20         | 0               | 12       | 0       |
| 40         | 0               | 22       | 0       |
| 60         | 0               | 24       | 0       |
| 80         | 0               | 32       | 0       |
| 100        | 0               | 33       | 0       |
| 120        | 2               | 35       | 1       |

**Table 2.** IPR removals obtained during ZVI/PS treatment in DW. IPR=2 mg/L; ZVI=1 g/L.

| Time (min) | IPR Removal (%)    |                    |                    |                    |                    |                    |
|------------|--------------------|--------------------|--------------------|--------------------|--------------------|--------------------|
|            | 0.10 mM PS, pH=5.0 | 0.25 mM PS, pH=5.0 | 0.50 mM PS, pH=5.0 | 0.75 mM PS, pH=5.0 | 1.00 mM PS, pH=5.0 | 0.50 mM PS, pH=3.0 |
| 0          | 0                  | 0                  | 0                  | 0                  | 0                  | 0                  |
| 2          | 0                  | 0                  | 0                  | 0                  | 0                  | 76                 |
| 5          | 0                  | 0                  | 0                  | 0                  | 0                  | 92                 |
| 10         | 0                  | 2                  | 0                  | 0                  | 0                  | 100                |
| 20         | 0                  | 1                  | 0                  | 0                  | 0                  | 100                |
| 40         | 0                  | 2                  | 0                  | 0                  | 4                  | 100                |
| 60         | 0                  | 6                  | 0                  | 24                 | 34                 | 100                |
| 80         | 0                  | 0                  | 16                 | 25                 | 100                | 100                |
| 100        | 0                  | 1                  | 40                 | 47                 | 100                | 100                |
| 120        | 0                  | 4                  | 100                | 100                | 100                | 100                |

**Table 3.** IPR removals obtained during ZVA/PS treatments in DW. IPR=2 mg/L; ZVA=1 g/L.

| Time (min) | IPR Removal (%)    |                    |                    |                    |                    |                    |
|------------|--------------------|--------------------|--------------------|--------------------|--------------------|--------------------|
|            | 0.10 mM PS, pH=3.0 | 0.25 mM PS, pH=3.0 | 0.50 mM PS, pH=3.0 | 0.75 mM PS, pH=3.0 | 1.00 mM PS, pH=3.0 | 0.50 mM PS, pH=1.5 |
| 0          | 0                  | 0                  | 0                  | 0                  | 0                  | 0                  |
| 2          | 8                  | 0                  | 0                  | 0                  | 6                  | 12                 |
| 5          | 0                  | 4                  | 7                  | 0                  | 5                  | 14                 |
| 10         | 5                  | 3                  | 6                  | 0                  | 9                  | 20                 |
| 20         | 5                  | 12                 | 8                  | 10                 | 14                 | 22                 |
| 40         | 29                 | 44                 | 14                 | 25                 | 24                 | 29                 |
| 60         | 38                 | 51                 | 26                 | 41                 | 40                 | 48                 |
| 80         | 55                 | 64                 | 66                 | 71                 | 58                 | 69                 |
| 100        | 68                 | 79                 | 86                 | 89                 | 85                 | 91                 |
| 120        | 82                 | 80                 | 100                | 100                | 100                | 100                |

**Table 4.** IPR and DOC removals as well as PS consumptions obtained during ZVI/PS treatment in DW. IPR=10 mg/L; DOC=4.3 mg/L; PS=2.50 mM; ZVI=1 g/L; pH=3.0.

| Time (min) | IPR Removal (%) | DOC Removal (%) | PS Consumption (%) |
|------------|-----------------|-----------------|--------------------|
| 0          | 0               | 0               | 0                  |
| 10         | 97              | 0               | 77                 |
| 20         | ~100            | 10              | 79                 |

|            |      |    |    |
|------------|------|----|----|
| <b>40</b>  | ~100 | 17 | 80 |
| <b>60</b>  | ~100 | 17 | 81 |
| <b>90</b>  | ~100 | 19 | 83 |
| <b>120</b> | ~100 | 21 | 85 |

**Table 5.** IPR and DOC removals as well as PS consumptions during ZVA/PS treatment in DW. IPR=10 mg/L; PS=2.50 mM; DOC for 10 mg/L IPR=4.3 mg/L; ZVA=1 g/L; pH=3.0.

| <b>Time (min)</b> | <b>IPR Removal (%)</b> | <b>DOC Removal (%)</b> | <b>PS Consumption (%)</b> |
|-------------------|------------------------|------------------------|---------------------------|
| <b>0</b>          | 0                      | 0                      | 0                         |
| <b>10</b>         | 1                      | 0                      | 18                        |
| <b>20</b>         | 5                      | 0                      | 23                        |
| <b>40</b>         | 12                     | 0                      | 25                        |
| <b>60</b>         | 13                     | 0                      | 25                        |
| <b>90</b>         | 40                     | 0                      | 28                        |
| <b>120</b>        | 65                     | 2                      | 33                        |

**Table 6.** IPR and DOC removals as well as PS consumptions during ZVI/PS treatments in SWW. IPR=2 mg/L; DOC=11.4 mg/L; PS=1.50 mM; ZVI=1 g/L, pH=3.0.

| <b>Time (min)</b> | <b>IPR Removal (%)</b> | <b>DOC Removal (%)</b> | <b>PS Consumption (%)</b> |
|-------------------|------------------------|------------------------|---------------------------|
| <b>0</b>          | 0                      | 0                      | 0                         |
| <b>2</b>          | 14                     | 15                     | 10                        |
| <b>5</b>          | 47                     | 16                     | 21                        |
| <b>10</b>         | 54                     | 25                     | 38                        |
| <b>20</b>         | 100                    | 30                     | 53                        |
| <b>40</b>         | 100                    | 32                     | 91                        |
| <b>60</b>         | 100                    | 36                     | 92                        |
| <b>80</b>         | 100                    | 38                     | 94                        |
| <b>100</b>        | 100                    | 37                     | 88                        |
| <b>120</b>        | 100                    | 40                     | 86                        |

**Table 7.** IPR and DOC removals as well as PS consumptions during ZVA/PS treatments in SWW. IPR=2 mg/L; DOC=11.96 mg/L; PS=1.50 mM; ZVA=1 g/L, pH=3.0.

| <b>Time (min)</b> | <b>IPR Removal (%)</b> | <b>DOC Removal (%)</b> | <b>PS Consumption (%)</b> |
|-------------------|------------------------|------------------------|---------------------------|
| <b>0</b>          | 0                      | 0                      | 0                         |
| <b>20</b>         | 0                      | 3                      | -                         |
| <b>40</b>         | 0                      | 5                      | -                         |
| <b>60</b>         | 0                      | 5                      | -                         |
| <b>80</b>         | 1                      | 8                      | -                         |
| <b>100</b>        | 1                      | 9                      | -                         |
| <b>120</b>        | 4                      | 9                      | 5                         |
